# Supplementary figures and images for: Sprouty genes prevent excessive FGF signalling in multiple cell types throughout development of the cerebellum
Source: Oxford University Press journal article supplement (doi:10.1242/dev.063784), 2011-06-21

**Cresyl Violet**

**Calbindin**

**WT**

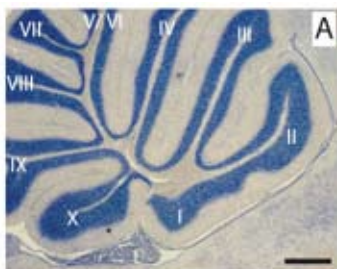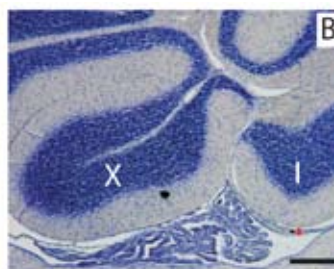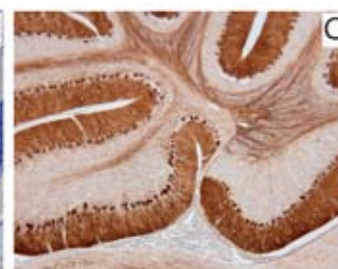

***Spry1*<sup>-/-</sup>**

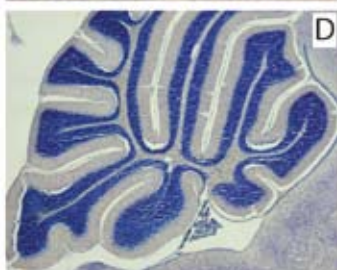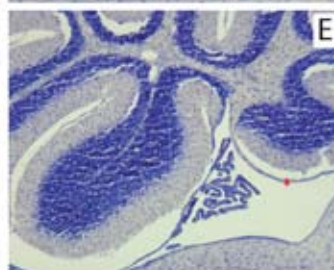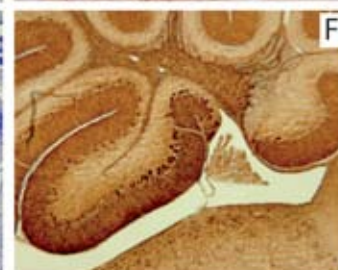

***Spry2*<sup>-/-</sup>**

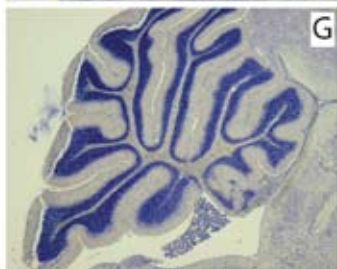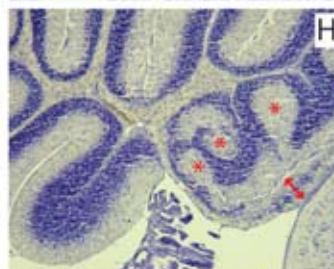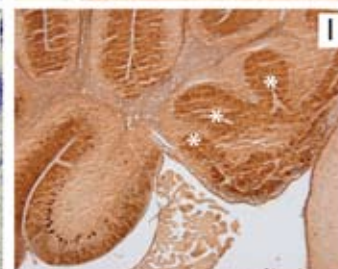

***Spry4*<sup>-/-</sup>**

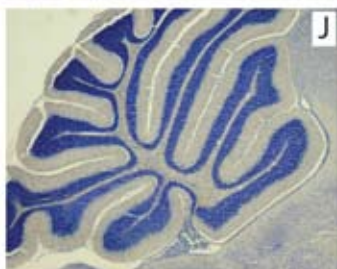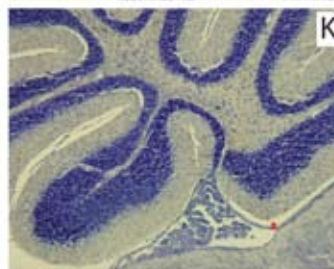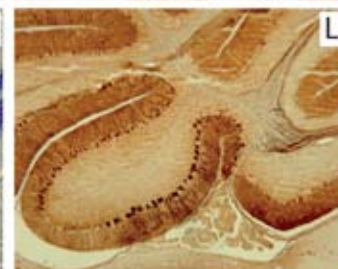

Supplement: dev063784figs1.pdf [file dev063784figs1.pdf]

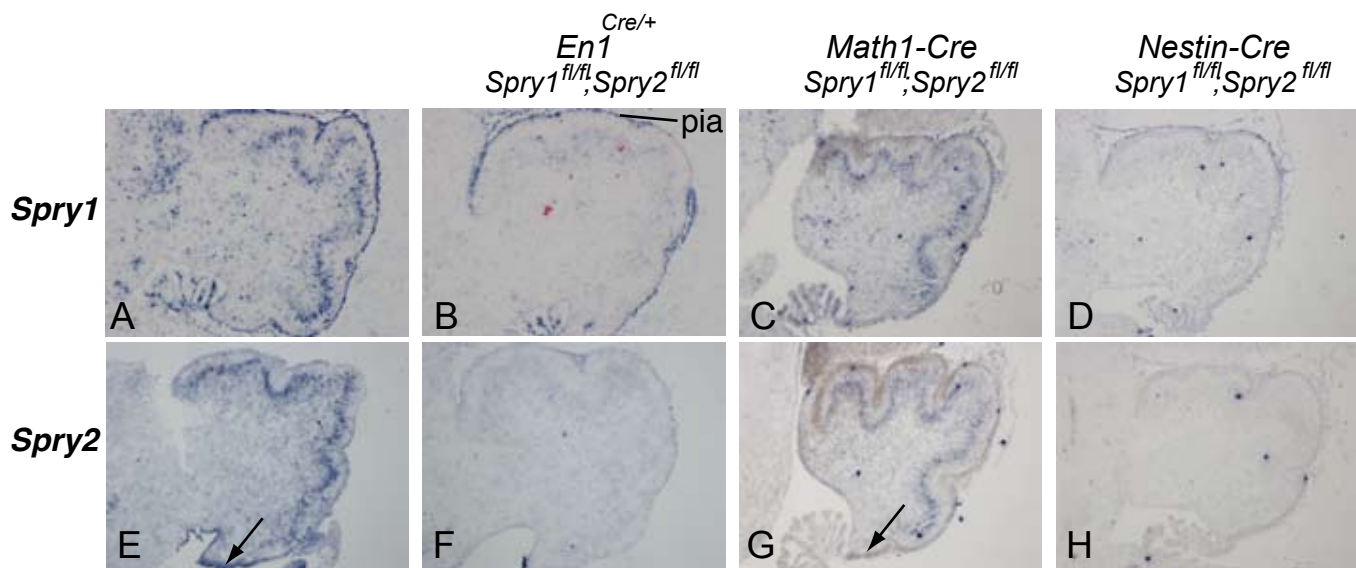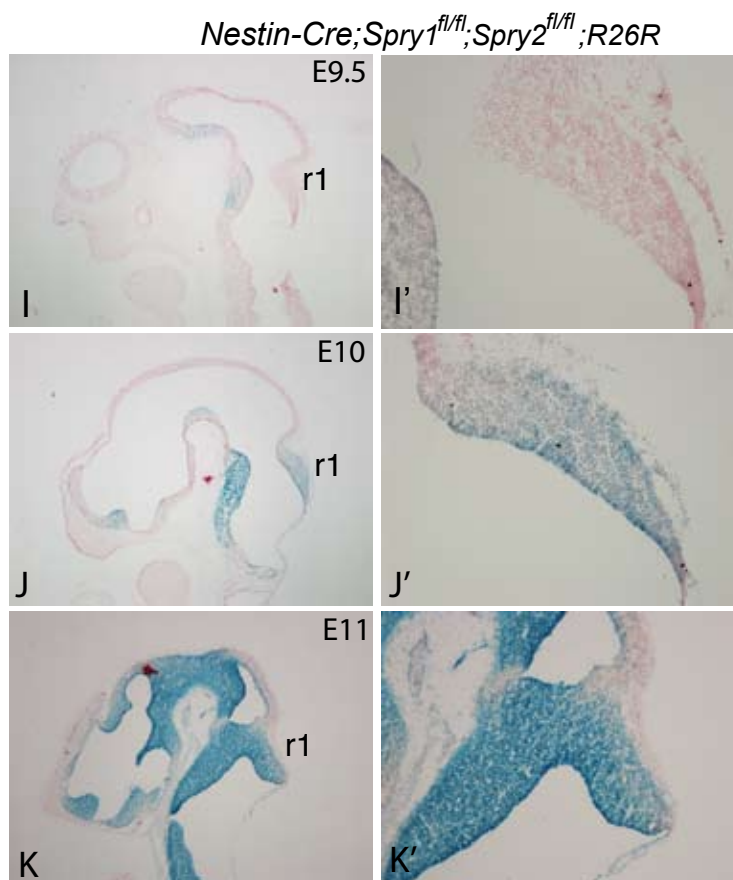

Supplement: dev063784figs2.pdf [file dev063784figs2.pdf]

*Spry1*<sup>fl/fl</sup>; *Spry2*<sup>fl/fl</sup>      *En1*<sup>Cre/+</sup>; *Spry1*<sup>fl/fl</sup>; *Spry2*<sup>fl/fl</sup>

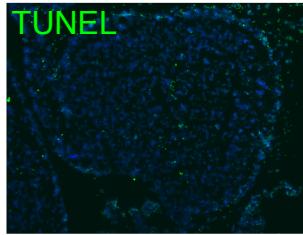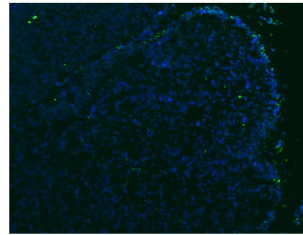

E18.5

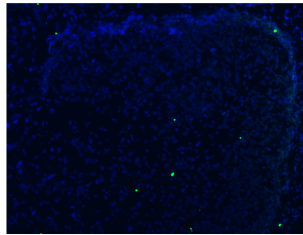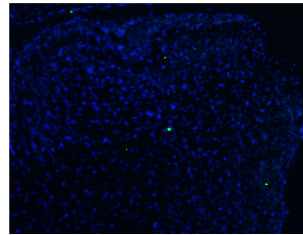

P0

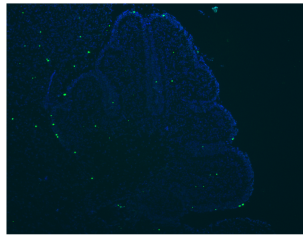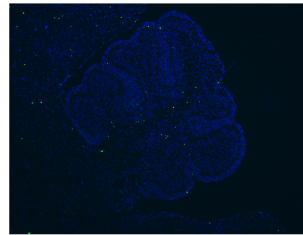

P3

Supplement: dev063784figs3.pdf [file dev063784figs3.pdf]
